# Supplementary material for: Galectin-1 promotes hepatocellular carcinoma and the combined therapeutic effect of OTX008 galectin-1 inhibitor and sorafenib in tumor cells
Source: PubMed Central journal article supplement (PMC6805403; doi:10.1186/s13046-019-1402-x), 2019-10-22
Supplement: 13046_2019_1402_MOESM1_ESM.pdf [file 13046_2019_1402_MOESM1_ESM.pdf]

**Galectin-1 promotes hepatocellular carcinoma and the combined therapeutic effect of OTX008 galectin-1 inhibitor and sorafenib**

Zoe Leung<sup>1</sup>, Frankie Chi Fat Ko<sup>1</sup>, Mao Xiaowen<sup>1</sup>, Ernest Man Lok Kwong<sup>1</sup>, Bonnie Man Hei Liu<sup>1</sup>, Tey Sze Keong<sup>1</sup>, Angel Po Yee Ma<sup>1</sup>, Yi Man Eva Fung<sup>2,3</sup>, Chi-Ming Che<sup>2,3</sup>, Danny Ka Ho Wong<sup>4,5</sup>, Ching Lung Lai<sup>4,5</sup>, Irene Oi-Lin Ng<sup>1,5</sup>, Judy Wai Ping Yam<sup>1,5</sup>

<sup>1</sup>Department of Pathology, The University of Hong Kong, Hong Kong

<sup>2</sup>Department of Chemistry, The University of Hong Kong, Hong Kong

<sup>3</sup>State Key Laboratory of Synthetic Chemistry, The University of Hong Kong, Hong Kong

<sup>4</sup>Department of Medicine, Queen Mary Hospital, The University of Hong Kong, Hong Kong

<sup>5</sup>State Key Laboratory of Liver Research (The University of Hong Kong)

Corresponding author

Judy Wai Ping Yam

Department of Pathology, Block T, Queen Mary Hospital, Pokfulam, Hong Kong.

Tel: (852) 2255-2681; Fax: (852) 2218-5212; E-mail: judyyam@pathology.hku.hk

***Supplementary information***

Supplementary Methods

Supplementary Figures

Supplementary Table

## **Supplementary Methods**

### **Antibodies and Taqman probes**

The following primary antibodies were selected for the analysis of protein analysis via immunoblot: Galectin-1 (Abcam, Cambridge, UK), HIF1 $\alpha$  (Cell Signaling Technologies, Massachusetts, USA),  $\beta$ -actin (Sigma-Aldrich, St Louis, Missouri, USA). The following TaqMan probes were selected and purchased from ThermoFisher Scientific (Waltham, Massachusetts, USA) for RNA analysis by RT-qPCR: LGALS1 (FAM), has-mir-22 (FAM), RNU6 (FAM) and Human HPRT (HGPRT) Endogenous Control (VIC).

### **Cell lysate extraction and western blot**

The successfulness of the stable transfection was analyzed by cell lysate extraction for immunoblot analysis. Cell lysates were obtained by cell lysis with NETN lysis buffer, supplemented with 10% cOmplete™ protease inhibitor cocktail and 10% PhosStop phosphatase inhibitor cocktail (Roche Applied Science, Penzberg, Germany). Total cell lysis was carried out on ice for 30 mins and cleared of cell debris by centrifugation at 4°C. Protein quantification was carried out using Bradford reagent (Bio-Rad Corporation, CA, USA) against a standard concentration of bovine serum albumin (BSA). A total of 30  $\mu$ g of protein was fractionated on SDS-PAGE, followed by a wet transfer to PVDF membranes (Amersham, GE Healthcare, Buckinghamshire, UK). Membranes were then blocked in 5% non-skimmed milk in TBST. Once sufficiently washed, membranes were incubated in the following primary antibody in their optimized dilutions: Gal-1 (1:2000),  $\beta$ -actin (1:5000), HIF1 $\alpha$  (1:1000) and  $\alpha$ -tubulin (1:1000). Membranes were incubated overnight at 4°C which were then followed by another wash in TBST before incubation with the appropriate secondary antibody for 1 hour at room temperature, with shaking. Chemiluminescent signals

were then detected using ECL™ Western Blotting Detection Reagents (Amersham™ GE Healthcare).

### **RNA extraction and Quantitative real time PCR (RT-qPCR)**

Total RNA extraction from cells was performed following the TRIzol® reagent protocol (ThermoFisher Scientific, MA, USA). Reverse transcription (RT) for the generation of cDNA was performed with the SuperScript™ VILO™ Master Mix and qPCR with the TaqMan Real-Time PCR Master Mix. Individual samples of each probe were performed in triplicate wells. The data generated from qPCR was analyzed by the  $\Delta\Delta CT$  method, with relative Gal-1 and RER1 levels normalized to HPRT and relative miR-22 levels normalized to RNU6. For analyzing Gal-1 expression in HCC tissues, a 2-fold increase and decrease in Gal-1 expression in tumor tissues when compared to non-tumorous tissues was regarded as Gal-1 overexpression and underexpression, respectively.

### **Plasmid construction and dual-luciferase reporter assay**

For the determination of the direct regulation of miR-22 and Gal-1 3'UTR, a luciferase reporter vector was designed as follows: forward primer: 5'-TCGAGATGGCCCC CAATAAAGGCAGCTGCGAATTCGATGGCCCCCAATAAAGAGCT-3'; reverse primer: 5'-CTTTATTGGGGGCCATCGAATTCGCAGCTGCCTTTATTGGGGGCCATC-3'. This set of primers were subjected to sequential temperatures for annealing, first at 95°C for 10 minutes and then reduced to 55°C for 5 minutes before allowing to completely anneal at room temperature for at least 1 hr. This was then followed by T4 PNK (ThermoScientific) treatment for 30 minutes at 37°C. The pmirGLO-Dual luciferase miRNA Target Expression Vector (Promega, Madison, Wisconsin, USA) was cut sequentially with XhoI for 15 minutes

and then with SacI for a further 15 mins. For dephosphorylation, the digested product was treated with Anza™ alkaline phosphatase for 15 mins at 37°C.

The prepared insert and vector were then ligated and successful colonies were selected after transformation into *E.coli* DH5α competent cells. Successful insert clones were purified and used in co-transfection in 293FT. The dual luciferase reporter assay was carried out following the kit's manual (Promega), with the final luciferase activity normalized with the activity of *Renilla* luciferase.

## Supplementary Figures

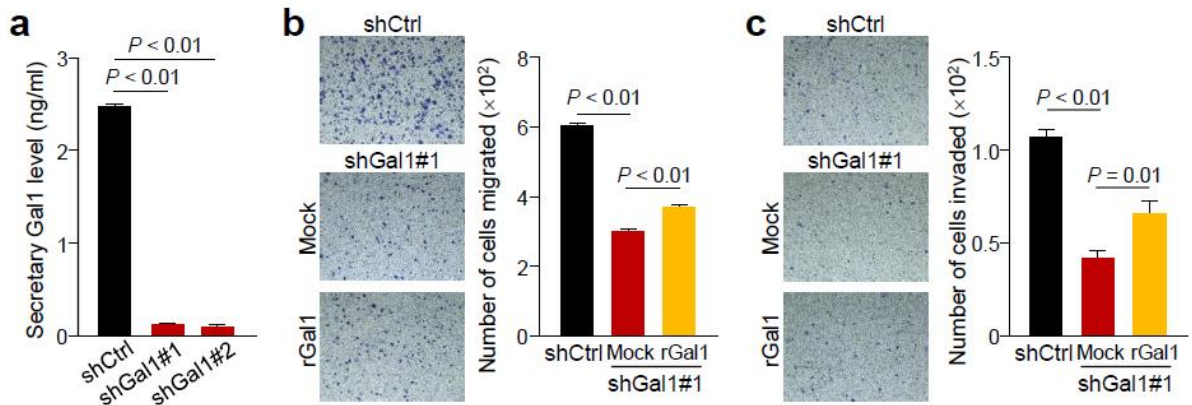

**Figure S1. Knockdown of Gal-1 reduced production of secretory Gal-1. a.**

ELISA analysis revealed the significant reduction in secretory Gal-1 levels in the conditioned medium of control shCtrl and Gal-1 knockdown clones (shGal-1#1 and shGal-1#2) established in MHCC97L cells. Recombinant Gal-1 (rGal1) treatment to MHCC97L shGal1 cells showed that rGal1 was able to enhance cell migration (**b**) and invasion (**c**) despite Gal-1 expression knockdown.

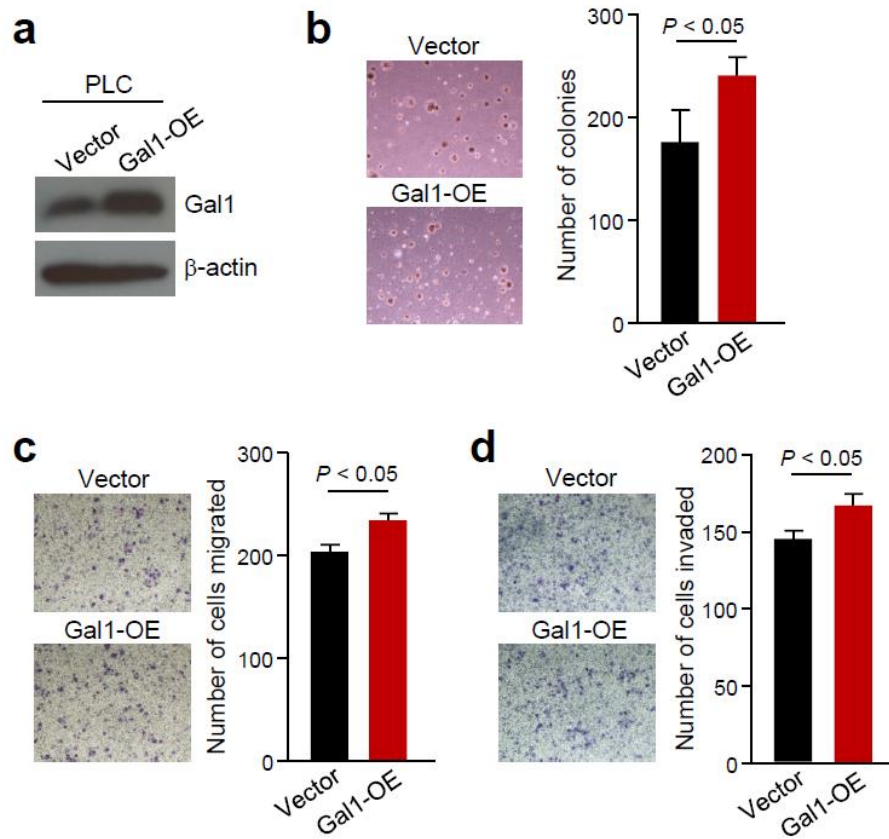

**Figure S2. Overexpression of Gal-1 enhanced anchorage independent growth, cell migration and invasiveness in HCC cells. a.** Western blotting revealed Gal-1 level in Gal-1 overexpression cells established in PLC/PRF/5. **b.** Significant increase in the number of colonies formed in soft agar assay (**c**). **d.** Gal-1 overexpression in PLC/PRF/5 cells markedly increased cell migration and invasion.

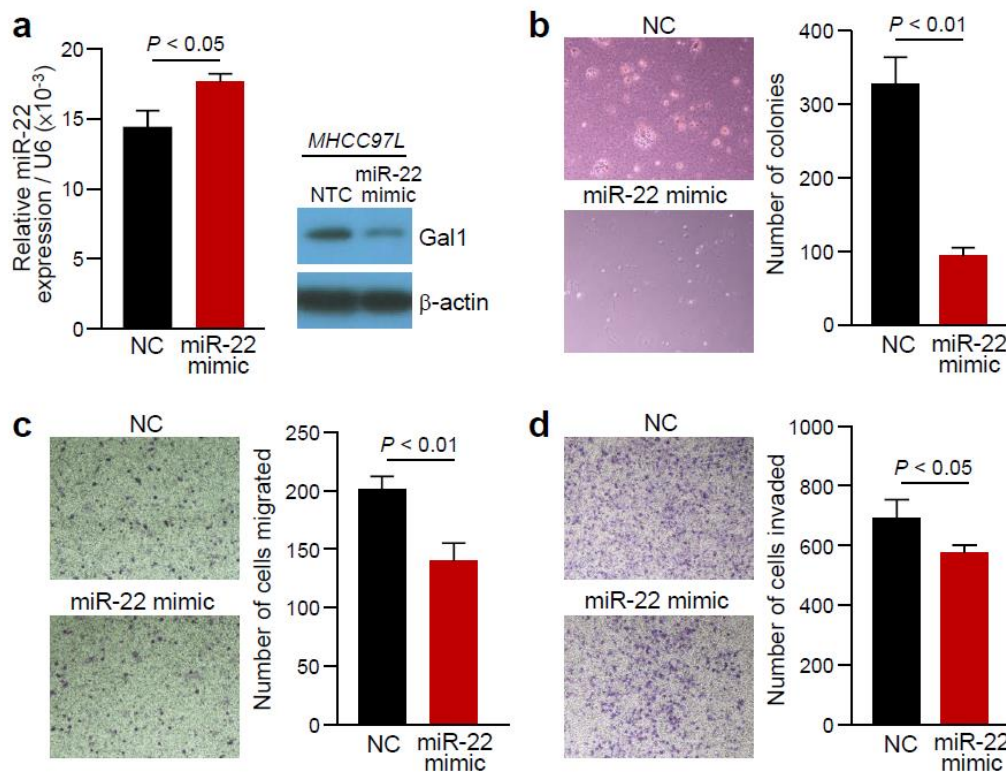

**Figure S3. miR-22 negatively regulated HCC cell aggressiveness. a.** qPCR

revealed enhanced level of miR-22 in stable miR-22 mimic cells when compared to the non-target control (NC) cells established in MHCC97L. Western blotting revealed the concomitant downregulation of Gal-1 level in stable miR-22 mimic cells. **b.** Significant decrease in the number of colonies formed in soft agar assay. Migration (**c**) and invasion (**d**) assays revealed diminished migratory and invasive potentials of stable miR-22 mimic cells.

Table S1: Clinicopathological analysis of miR-22 in HCC clinical samples

| Histopathological parameters |                | T/NT $\leq$ 0.5<br>(with miR22<br>underexpression) | T/NT $>$ 0.5<br>(without miR22<br>underexpression) | P-value |
|------------------------------|----------------|----------------------------------------------------|----------------------------------------------------|---------|
| Sex                          | Male           | 26                                                 | 29                                                 | 0.609   |
|                              | Female         | 11                                                 | 9                                                  |         |
| Cirrhotic liver              | Cirrhosis      | 7                                                  | 10                                                 | 0.542   |
|                              | NT & hepatitis | 15                                                 | 13                                                 |         |
| HBsAg                        | Positive       | 19                                                 | 23                                                 | 1.000   |
|                              | Negative       | 3                                                  | 4                                                  |         |
| Cellular differentiation     | Poor           | 7                                                  | 14                                                 | 0.075   |
|                              | Differentiated | 15                                                 | 9                                                  |         |
| Tumour size                  | $>$ 5 cm       | 15                                                 | 15                                                 | 1.000   |
|                              | $\leq$ 5 cm    | 7                                                  | 8                                                  |         |
| Tumour encapsulation         | Absent         | 12                                                 | 15                                                 | 0.587   |
|                              | Present        | 14                                                 | 12                                                 |         |
| Venous invasion              | Present        | 15                                                 | 21                                                 | 0.098   |
|                              | Absent         | 22                                                 | 13                                                 |         |
| Microsatellite               | Present        | 7                                                  | 15                                                 | 0.049   |
|                              | Absent         | 16                                                 | 10                                                 |         |
| Direct liver invasion        | Present        | 7                                                  | 6                                                  | 0.520   |
|                              | Absent         | 11                                                 | 15                                                 |         |
| Tumour nodule                | $N \geq 2$     | 5                                                  | 5                                                  | 1.000   |
|                              | $N = 1$        | 17                                                 | 17                                                 |         |

T, Tumorous; NT, non-tumorous; N, number of tumor nodule; HBsAg, Hepatitis B surface antigen;  $P < 0.05$  is regarded as statistically significant
